# Supplementary material
Source: PubMed Central journal article supplement (PMC3476468)
Supplement: NIHMS31431-supplement-Supplemental_Figures.pdf [file NIHMS31431-supplement-Supplemental_Figures.pdf]

TITLE TWO DIFFERENT CONFORMATIONS OF COMPOUND 20  
COMPND MOL\_ID: 1;  
COMPND 2 MOLECULE: (1S,8S)-11-(2,4-Dimethoxy-benzyl)-3-oxa-9,11-diaza-  
bicyclo[6.2.2]dodec-5-ene-10,12-dione (16)  
COMPND MOL\_ID: 2;  
COMPND 2 MOLECULE: (1S,8S)-11-(2,4-Dimethoxy-benzyl)-3-oxa-9,11-diaza-  
bicyclo[6.2.2]dodec-5-ene-10,12-dione (16)  
EXPDTA THEORETICAL MODEL  
AUTHOR STEFANO COSTANZI  
AUTHOR 2 SCOSTANZ@HELIX.NIH.GOV  
JRNL AUTH P. BESADA, L.MAMEDOVA, C.J. THOMAS, S.COSTANZI,K.A.JACOBSON  
JRNL TITL DESIGN AND SYNTHESIS OF NEW BICYCLIC DIKETOPIPERAZINES AS  
SCAFFOLDS  
JRNL TITL 2 FOR RECEPTOR PROBES OF STRUCTURALLY DIVERSE FUNCTIONALITY  
JRNL REF ORGANIC & BIOMOLECULAR CHEMISTRY

|        |    |     |     |   |         |        |        |      |      |
|--------|----|-----|-----|---|---------|--------|--------|------|------|
| HETATM | 1  | N   | MOL | 1 | -4.968  | -0.419 | -1.350 | 1.00 | 0.00 |
| HETATM | 2  | C   | MOL | 1 | -4.808  | 0.941  | -1.509 | 1.00 | 0.00 |
| HETATM | 3  | O   | MOL | 1 | -4.157  | 1.400  | -2.444 | 1.00 | 0.00 |
| HETATM | 4  | C1  | MOL | 1 | -5.490  | 1.882  | -0.476 | 1.00 | 0.00 |
| HETATM | 5  | C2  | MOL | 1 | -4.418  | 2.436  | 0.492  | 1.00 | 0.00 |
| HETATM | 6  | N1  | MOL | 1 | -6.717  | 1.238  | 0.107  | 1.00 | 0.00 |
| HETATM | 7  | C3  | MOL | 1 | -7.841  | 2.119  | 0.495  | 1.00 | 0.00 |
| HETATM | 8  | C4  | MOL | 1 | -6.870  | -0.142 | 0.153  | 1.00 | 0.00 |
| HETATM | 9  | O1  | MOL | 1 | -7.915  | -0.693 | 0.500  | 1.00 | 0.00 |
| HETATM | 10 | C5  | MOL | 1 | -5.631  | -1.035 | -0.201 | 1.00 | 0.00 |
| HETATM | 11 | C6  | MOL | 1 | -4.831  | -1.271 | 1.110  | 1.00 | 0.00 |
| HETATM | 12 | C7  | MOL | 1 | -3.342  | -1.511 | 0.929  | 1.00 | 0.00 |
| HETATM | 13 | C8  | MOL | 1 | -2.372  | -0.587 | 0.808  | 1.00 | 0.00 |
| HETATM | 14 | C9  | MOL | 1 | -2.482  | 0.925  | 0.756  | 1.00 | 0.00 |
| HETATM | 15 | O2  | MOL | 1 | -3.700  | 1.486  | 1.291  | 1.00 | 0.00 |
| HETATM | 16 | C10 | MOL | 1 | -8.651  | 2.666  | -0.667 | 1.00 | 0.00 |
| HETATM | 17 | C11 | MOL | 1 | -8.485  | 3.974  | -1.165 | 1.00 | 0.00 |
| HETATM | 18 | O3  | MOL | 1 | -7.537  | 4.806  | -0.558 | 1.00 | 0.00 |
| HETATM | 19 | C12 | MOL | 1 | -7.272  | 6.094  | -1.104 | 1.00 | 0.00 |
| HETATM | 20 | C13 | MOL | 1 | -9.261  | 4.410  | -2.240 | 1.00 | 0.00 |
| HETATM | 21 | C14 | MOL | 1 | -10.206 | 3.574  | -2.844 | 1.00 | 0.00 |
| HETATM | 22 | O4  | MOL | 1 | -11.002 | 3.952  | -3.915 | 1.00 | 0.00 |
| HETATM | 23 | C15 | MOL | 1 | -10.848 | 5.260  | -4.458 | 1.00 | 0.00 |
| HETATM | 24 | C16 | MOL | 1 | -10.361 | 2.280  | -2.341 | 1.00 | 0.00 |
| HETATM | 25 | C17 | MOL | 1 | -9.593  | 1.852  | -1.276 | 1.00 | 0.00 |
| HETATM | 26 | N   | MOL | 2 | -4.998  | -0.428 | -1.371 | 1.00 | 0.00 |
| HETATM | 27 | C   | MOL | 2 | -4.849  | 0.934  | -1.537 | 1.00 | 0.00 |
| HETATM | 28 | O   | MOL | 2 | -4.249  | 1.397  | -2.501 | 1.00 | 0.00 |
| HETATM | 29 | C1  | MOL | 2 | -5.491  | 1.877  | -0.475 | 1.00 | 0.00 |
| HETATM | 30 | C2  | MOL | 2 | -4.375  | 2.401  | 0.463  | 1.00 | 0.00 |
| HETATM | 31 | N1  | MOL | 2 | -6.722  | 1.249  | 0.108  | 1.00 | 0.00 |
| HETATM | 32 | C3  | MOL | 2 | -7.848  | 2.134  | 0.477  | 1.00 | 0.00 |
| HETATM | 33 | C4  | MOL | 2 | -6.846  | -0.131 | 0.212  | 1.00 | 0.00 |
| HETATM | 34 | O1  | MOL | 2 | -7.874  | -0.687 | 0.600  | 1.00 | 0.00 |
| HETATM | 35 | C5  | MOL | 2 | -5.626  | -1.041 | -0.203 | 1.00 | 0.00 |
| HETATM | 36 | C6  | MOL | 2 | -4.716  | -1.385 | 1.021  | 1.00 | 0.00 |
| HETATM | 37 | C7  | MOL | 2 | -5.237  | -0.828 | 2.334  | 1.00 | 0.00 |
| HETATM | 38 | C8  | MOL | 2 | -4.829  | 0.283  | 2.967  | 1.00 | 0.00 |
| HETATM | 39 | C9  | MOL | 2 | -3.741  | 1.249  | 2.549  | 1.00 | 0.00 |
| HETATM | 40 | O2  | MOL | 2 | -3.585  | 1.407  | 1.127  | 1.00 | 0.00 |
| HETATM | 41 | C10 | MOL | 2 | -7.605  | 3.029  | 1.680  | 1.00 | 0.00 |
| HETATM | 42 | C11 | MOL | 2 | -7.750  | 2.570  | 3.005  | 1.00 | 0.00 |
| HETATM | 43 | O3  | MOL | 2 | -8.145  | 1.246  | 3.213  | 1.00 | 0.00 |
| HETATM | 44 | C12 | MOL | 2 | -8.475  | 0.799  | 4.525  | 1.00 | 0.00 |
| HETATM | 45 | C13 | MOL | 2 | -7.494  | 3.434  | 4.071  | 1.00 | 0.00 |
| HETATM | 46 | C14 | MOL | 2 | -7.106  | 4.759  | 3.857  | 1.00 | 0.00 |
| HETATM | 47 | O4  | MOL | 2 | -6.834  | 5.662  | 4.873  | 1.00 | 0.00 |
| HETATM | 48 | C15 | MOL | 2 | -6.945  | 5.225  | 6.225  | 1.00 | 0.00 |

Supplementary Material (ESI) for Organic & Biomolecular Chemistry  
This journal is © The Royal Society of Chemistry 2005

```
HETATM 49 C16 MOL 2 -6.986 5.209 2.539 1.00 0.00
HETATM 50 C17 MOL 2 -7.236 4.351 1.486 1.00 0.00
CONNECT 1 2 10
CONNECT 2 3 4
CONNECT 4 5 6
CONNECT 5 15
CONNECT 6 7 8
CONNECT 7 16
CONNECT 8 9 10
CONNECT 10 11
CONNECT 11 12
CONNECT 12 13
CONNECT 13 14
CONNECT 14 15
CONNECT 16 17 25
CONNECT 17 18 20
CONNECT 18 19
CONNECT 20 21
CONNECT 21 22 24
CONNECT 22 23
CONNECT 24 25
CONNECT 26 27 35
CONNECT 27 28 29
CONNECT 29 30 31
CONNECT 30 40
CONNECT 31 32 33
CONNECT 32 41
CONNECT 33 34 35
CONNECT 35 36
CONNECT 36 37
CONNECT 37 38
CONNECT 38 39
CONNECT 39 40
CONNECT 41 42 50
CONNECT 42 43 45
CONNECT 43 44
CONNECT 45 46
CONNECT 46 47 49
CONNECT 47 48
CONNECT 49 50
END
```
